# Supplementary material for: Sacrificial template synthesis of a 3D flower-like Sn-doped BiOCl hierarchical structure with enhanced performance for degradation of tetracycline hydrochloride
Source: Royal Society of Chemistry journal article supplement (doi:10.1039/d5cy00006h), 2025-01-01
Supplement: d5cy00006h1.pdf [file d5cy00006h1.pdf]

**Sacrificial template synthesis of 3D flower-like Sn-doped BiOCl  
hierarchical structure with enhanced performance for  
degradation of tetracycline hydrochloride**

Shimin Long<sup>a</sup>, Wenguang Wang<sup>a,\*</sup>, Liangpeng Wu<sup>b,\*\*</sup>, Wentao Zhou<sup>a</sup>, Chuangbin

Hong<sup>a</sup>, Yingxian Lin<sup>a</sup>, Chenyi Jing<sup>a</sup>, Wen Luo<sup>a</sup>

<sup>a</sup>School of Materials and Energy, Guangdong University of Technology, Guangzhou  
Higher Education Mega Center 100#, Guangzhou, 510006, P. R. China

<sup>b</sup>Advanced Energy Science and Technology Guangdong Laboratory, Huizhou,  
516000, P. R. China

\* Corresponding author. Tel: +86-020-39322570; E-mail:  
wenguangwang2005@163.com

\*\* Corresponding author. E-mail: [wulp@gdlhz.ac.cn](mailto:wulp@gdlhz.ac.cn)

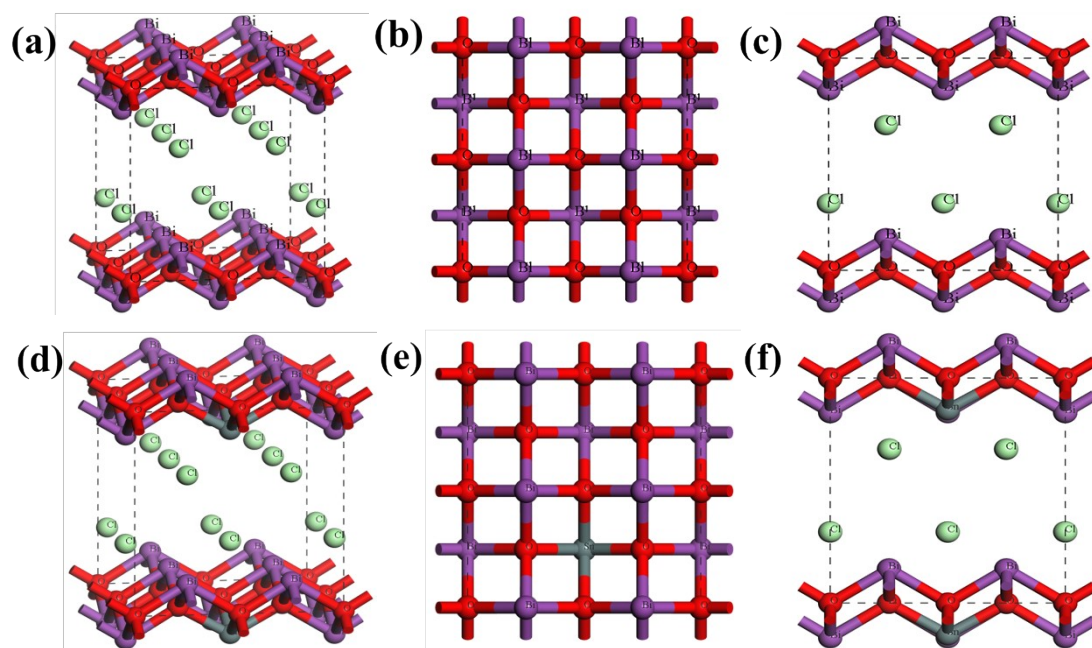

**Fig. S1** The optimized schematic representation of the crystal structures of pure BiOCl (a: front view, b: top view, c: side view), and Sn-doped BiOCl (d: front view, e: top view, f: side view).

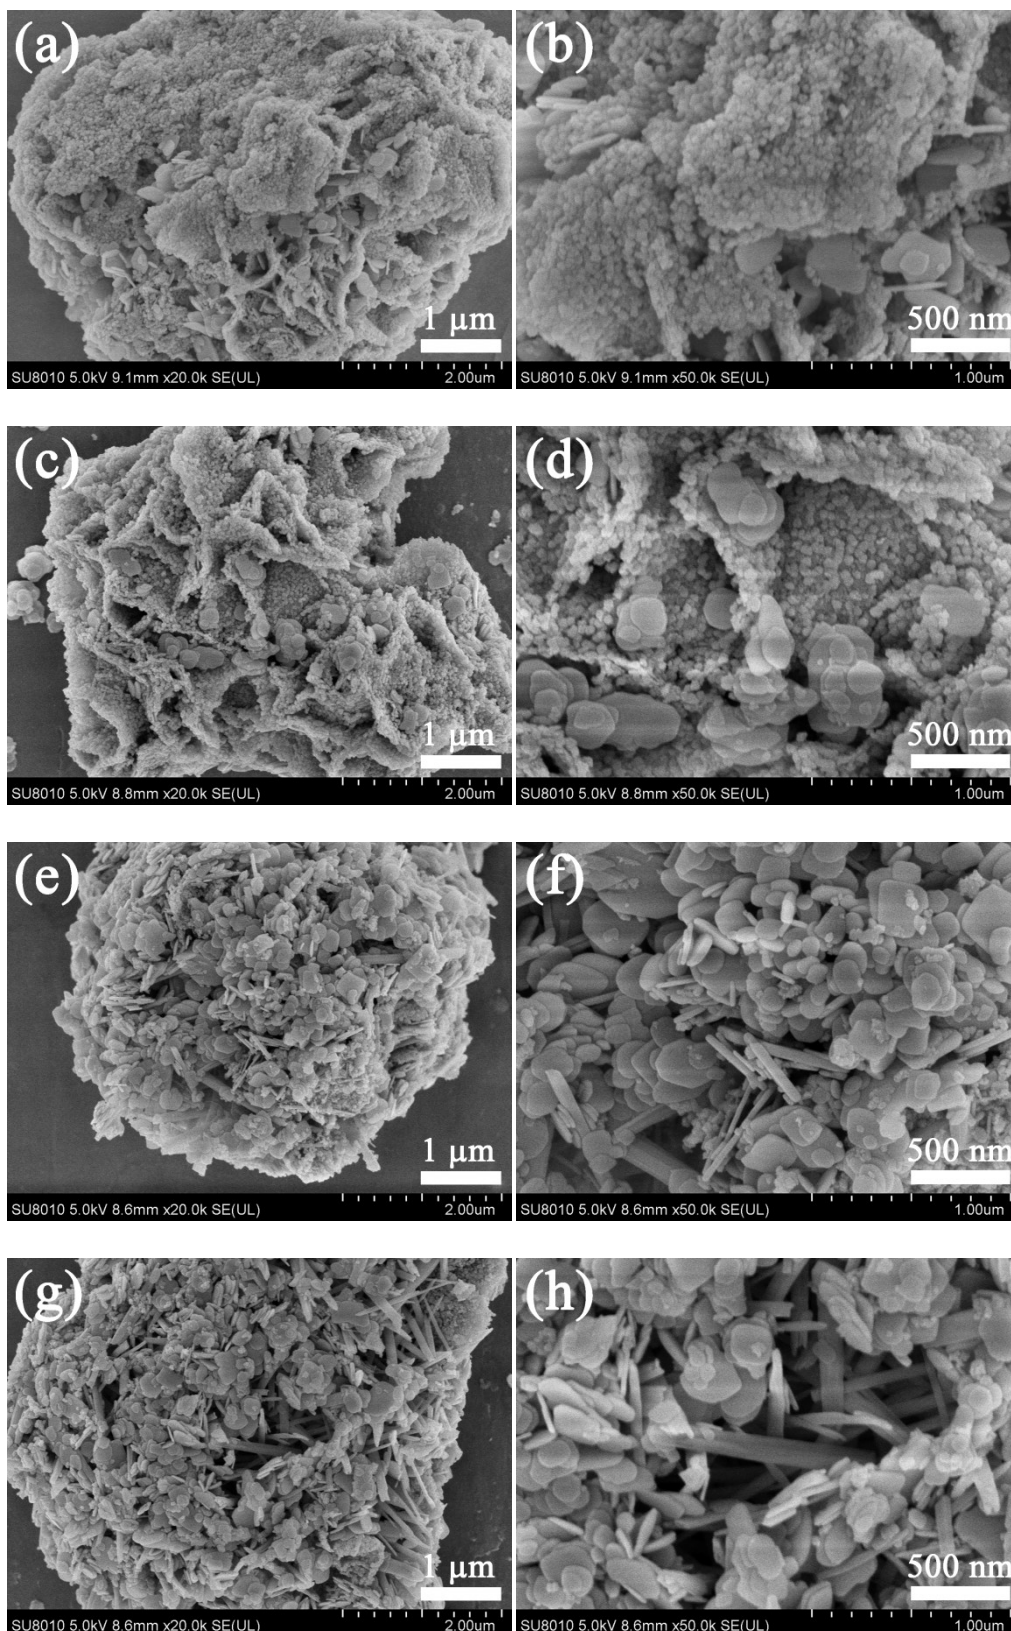

**Fig. S2** SEM images of the Sn-BiOCl-1 (a and b), Sn-BiOCl-2 (c and d), Sn-BiOCl-4 (e and f) and Sn-BiOCl-5 (g and h).

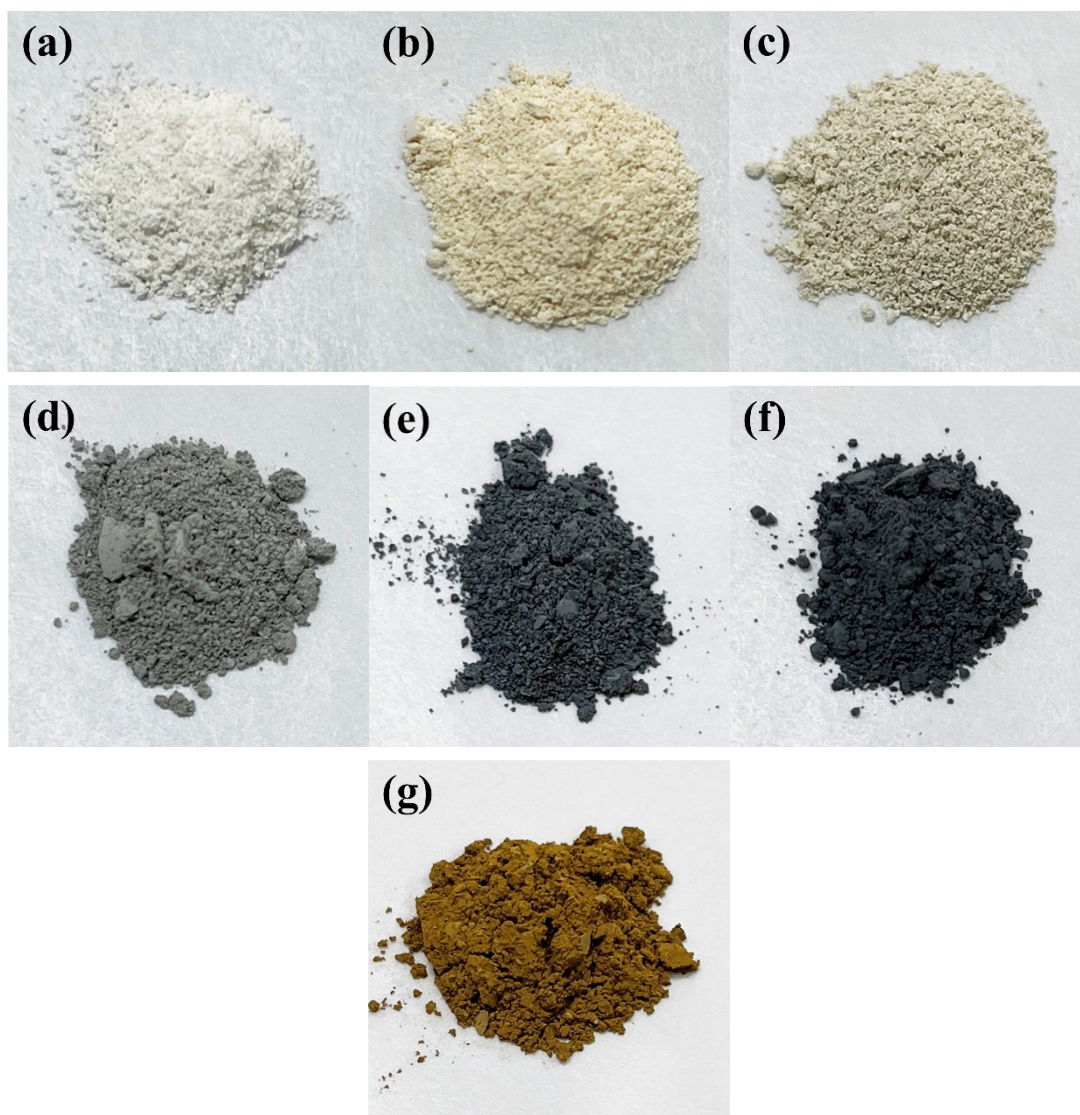

**Fig. S3** The digital photographs of pure BiOCl (a), Sn-BiOCl-1 (b), Sn-BiOCl-2 (c), Sn-BiOCl-3 (d), Sn-BiOCl-4 (e), Sn-BiOCl-5 (f) and SnS<sub>2</sub> (g).

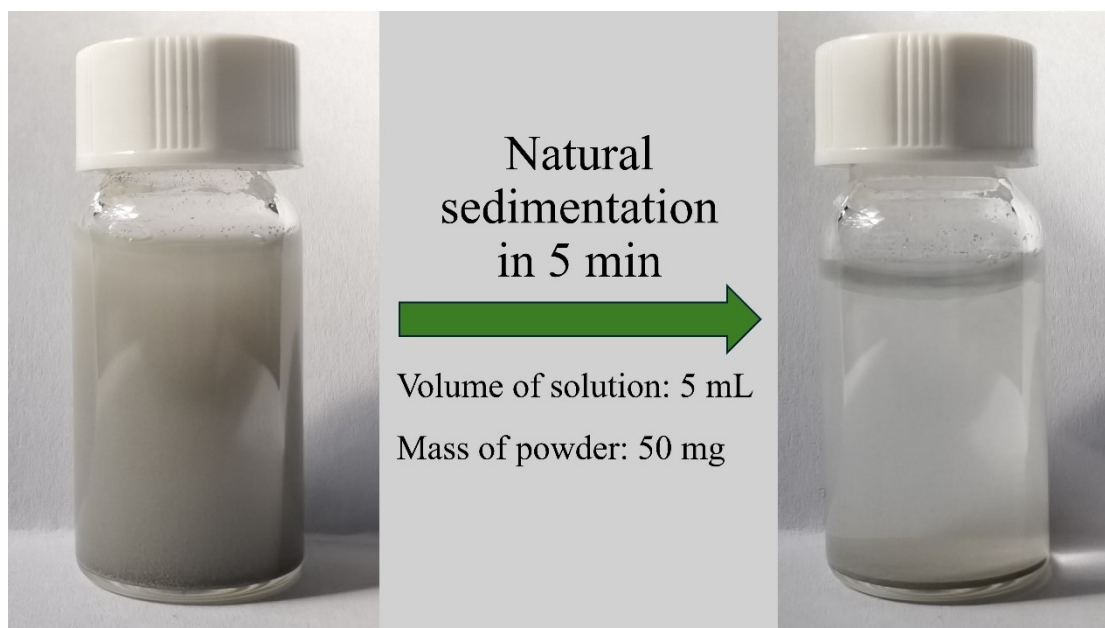

**Fig. S4** The digital photographs for the natural sedimentation of Sn-BiOCl-3 powder in TCH solution.

**Table S1** The LC-MS spectra and corresponding m/z values of TCH and its intermediate products during the photocatalytic oxidation process.

| Name | Mass-to-charge ratio (m/z) | LC-MS spectra                                                                                 |
|------|----------------------------|-----------------------------------------------------------------------------------------------|
| TCH  | 445                        | <p>SAMPLE #2812 RT: 9.96 AV: 1 NL: 2.32E7<br/>T: FTMS + p ESI Full ms [50.0000-750.0000]</p>  |
| A    | 477                        | <p>SAMPLE #367 RT: 1.26 AV: 1 NL: 2.97E7<br/>T: FTMS + p ESI Full ms [50.0000-750.0000]</p>   |
| B    | 461                        | <p>SAMPLE #2020 RT: 7.07 AV: 1 NL: 1.96E7<br/>T: FTMS + p ESI Full ms [50.0000-750.0000]</p>  |
| C    | 459                        | <p>SAMPLE #2913 RT: 10.34 AV: 1 NL: 1.75E7<br/>T: FTMS + p ESI Full ms [50.0000-750.0000]</p> |

|   |     |                                                                                               |
|---|-----|-----------------------------------------------------------------------------------------------|
| D | 427 | <p>SAMPLE #3748 RT: 13.25 AV: 1 NL: 2.21E7<br/>T: FTMS + p ESI Full ms [50.0000-750.0000]</p> |
| E | 399 | <p>SAMPLE #3981 RT: 14.02 AV: 1 NL: 2.89E7<br/>T: FTMS + p ESI Full ms [50.0000-750.0000]</p> |
| F | 371 | <p>SAMPLE #5404 RT: 18.38 AV: 1 NL: 3.82E7<br/>T: FTMS + p ESI Full ms [50.0000-750.0000]</p> |
| G | 279 | <p>SAMPLE #1851 RT: 6.45 AV: 1 NL: 1.81E7<br/>T: FTMS + p ESI Full ms [50.0000-750.0000]</p>  |

| <p>H</p> | <p>242</p>         | <p>SAMPLE #3162 RT: 11.25 AV: 1 NL: 7.21E7<br/>T: FTMS + p ESI Full ms [50.0000-750.0000]</p> <p>Relative Abundance vs m/z</p> <table border="1"> <thead> <tr> <th>m/z</th> <th>Relative Abundance</th> </tr> </thead> <tbody> <tr><td>56.05</td><td>~25</td></tr> <tr><td>50.04</td><td>~25</td></tr> <tr><td>61.04</td><td>~20</td></tr> <tr><td>74.06</td><td>~15</td></tr> <tr><td>116.99</td><td>~15</td></tr> <tr><td>148.01</td><td>~15</td></tr> <tr><td>191.02</td><td>~35</td></tr> <tr><td>198.13</td><td>~70</td></tr> <tr><td>214.09</td><td>~15</td></tr> <tr><td>242.15</td><td>100</td></tr> <tr><td>250.11</td><td>~25</td></tr> <tr><td>279.16</td><td>~5</td></tr> <tr><td>308.94</td><td>~5</td></tr> <tr><td>417.16</td><td>~5</td></tr> <tr><td>445.16</td><td>~5</td></tr> <tr><td>499.83</td><td>~5</td></tr> <tr><td>577.58</td><td>~5</td></tr> <tr><td>618.43</td><td>~5</td></tr> <tr><td>653.56</td><td>~5</td></tr> </tbody> </table>                                                                                                                                                       | m/z | Relative Abundance | 56.05 | ~25 | 50.04 | ~25 | 61.04  | ~20 | 74.06  | ~15 | 116.99 | ~15 | 148.01 | ~15 | 191.02 | ~35 | 198.13 | ~70 | 214.09 | ~15 | 242.15 | 100 | 250.11 | ~25 | 279.16 | ~5 | 308.94 | ~5  | 417.16 | ~5 | 445.16 | ~5  | 499.83 | ~5 | 577.58 | ~5  | 618.43 | ~5  | 653.56 | ~5 |        |    |        |    |        |    |        |    |
|----------|--------------------|---------------------------------------------------------------------------------------------------------------------------------------------------------------------------------------------------------------------------------------------------------------------------------------------------------------------------------------------------------------------------------------------------------------------------------------------------------------------------------------------------------------------------------------------------------------------------------------------------------------------------------------------------------------------------------------------------------------------------------------------------------------------------------------------------------------------------------------------------------------------------------------------------------------------------------------------------------------------------------------------------------------------------------------------------------------------------------------------------------------------------|-----|--------------------|-------|-----|-------|-----|--------|-----|--------|-----|--------|-----|--------|-----|--------|-----|--------|-----|--------|-----|--------|-----|--------|-----|--------|----|--------|-----|--------|----|--------|-----|--------|----|--------|-----|--------|-----|--------|----|--------|----|--------|----|--------|----|--------|----|
| m/z      | Relative Abundance |                                                                                                                                                                                                                                                                                                                                                                                                                                                                                                                                                                                                                                                                                                                                                                                                                                                                                                                                                                                                                                                                                                                           |     |                    |       |     |       |     |        |     |        |     |        |     |        |     |        |     |        |     |        |     |        |     |        |     |        |    |        |     |        |    |        |     |        |    |        |     |        |     |        |    |        |    |        |    |        |    |        |    |
| 56.05    | ~25                |                                                                                                                                                                                                                                                                                                                                                                                                                                                                                                                                                                                                                                                                                                                                                                                                                                                                                                                                                                                                                                                                                                                           |     |                    |       |     |       |     |        |     |        |     |        |     |        |     |        |     |        |     |        |     |        |     |        |     |        |    |        |     |        |    |        |     |        |    |        |     |        |     |        |    |        |    |        |    |        |    |        |    |
| 50.04    | ~25                |                                                                                                                                                                                                                                                                                                                                                                                                                                                                                                                                                                                                                                                                                                                                                                                                                                                                                                                                                                                                                                                                                                                           |     |                    |       |     |       |     |        |     |        |     |        |     |        |     |        |     |        |     |        |     |        |     |        |     |        |    |        |     |        |    |        |     |        |    |        |     |        |     |        |    |        |    |        |    |        |    |        |    |
| 61.04    | ~20                |                                                                                                                                                                                                                                                                                                                                                                                                                                                                                                                                                                                                                                                                                                                                                                                                                                                                                                                                                                                                                                                                                                                           |     |                    |       |     |       |     |        |     |        |     |        |     |        |     |        |     |        |     |        |     |        |     |        |     |        |    |        |     |        |    |        |     |        |    |        |     |        |     |        |    |        |    |        |    |        |    |        |    |
| 74.06    | ~15                |                                                                                                                                                                                                                                                                                                                                                                                                                                                                                                                                                                                                                                                                                                                                                                                                                                                                                                                                                                                                                                                                                                                           |     |                    |       |     |       |     |        |     |        |     |        |     |        |     |        |     |        |     |        |     |        |     |        |     |        |    |        |     |        |    |        |     |        |    |        |     |        |     |        |    |        |    |        |    |        |    |        |    |
| 116.99   | ~15                |                                                                                                                                                                                                                                                                                                                                                                                                                                                                                                                                                                                                                                                                                                                                                                                                                                                                                                                                                                                                                                                                                                                           |     |                    |       |     |       |     |        |     |        |     |        |     |        |     |        |     |        |     |        |     |        |     |        |     |        |    |        |     |        |    |        |     |        |    |        |     |        |     |        |    |        |    |        |    |        |    |        |    |
| 148.01   | ~15                |                                                                                                                                                                                                                                                                                                                                                                                                                                                                                                                                                                                                                                                                                                                                                                                                                                                                                                                                                                                                                                                                                                                           |     |                    |       |     |       |     |        |     |        |     |        |     |        |     |        |     |        |     |        |     |        |     |        |     |        |    |        |     |        |    |        |     |        |    |        |     |        |     |        |    |        |    |        |    |        |    |        |    |
| 191.02   | ~35                |                                                                                                                                                                                                                                                                                                                                                                                                                                                                                                                                                                                                                                                                                                                                                                                                                                                                                                                                                                                                                                                                                                                           |     |                    |       |     |       |     |        |     |        |     |        |     |        |     |        |     |        |     |        |     |        |     |        |     |        |    |        |     |        |    |        |     |        |    |        |     |        |     |        |    |        |    |        |    |        |    |        |    |
| 198.13   | ~70                |                                                                                                                                                                                                                                                                                                                                                                                                                                                                                                                                                                                                                                                                                                                                                                                                                                                                                                                                                                                                                                                                                                                           |     |                    |       |     |       |     |        |     |        |     |        |     |        |     |        |     |        |     |        |     |        |     |        |     |        |    |        |     |        |    |        |     |        |    |        |     |        |     |        |    |        |    |        |    |        |    |        |    |
| 214.09   | ~15                |                                                                                                                                                                                                                                                                                                                                                                                                                                                                                                                                                                                                                                                                                                                                                                                                                                                                                                                                                                                                                                                                                                                           |     |                    |       |     |       |     |        |     |        |     |        |     |        |     |        |     |        |     |        |     |        |     |        |     |        |    |        |     |        |    |        |     |        |    |        |     |        |     |        |    |        |    |        |    |        |    |        |    |
| 242.15   | 100                |                                                                                                                                                                                                                                                                                                                                                                                                                                                                                                                                                                                                                                                                                                                                                                                                                                                                                                                                                                                                                                                                                                                           |     |                    |       |     |       |     |        |     |        |     |        |     |        |     |        |     |        |     |        |     |        |     |        |     |        |    |        |     |        |    |        |     |        |    |        |     |        |     |        |    |        |    |        |    |        |    |        |    |
| 250.11   | ~25                |                                                                                                                                                                                                                                                                                                                                                                                                                                                                                                                                                                                                                                                                                                                                                                                                                                                                                                                                                                                                                                                                                                                           |     |                    |       |     |       |     |        |     |        |     |        |     |        |     |        |     |        |     |        |     |        |     |        |     |        |    |        |     |        |    |        |     |        |    |        |     |        |     |        |    |        |    |        |    |        |    |        |    |
| 279.16   | ~5                 |                                                                                                                                                                                                                                                                                                                                                                                                                                                                                                                                                                                                                                                                                                                                                                                                                                                                                                                                                                                                                                                                                                                           |     |                    |       |     |       |     |        |     |        |     |        |     |        |     |        |     |        |     |        |     |        |     |        |     |        |    |        |     |        |    |        |     |        |    |        |     |        |     |        |    |        |    |        |    |        |    |        |    |
| 308.94   | ~5                 |                                                                                                                                                                                                                                                                                                                                                                                                                                                                                                                                                                                                                                                                                                                                                                                                                                                                                                                                                                                                                                                                                                                           |     |                    |       |     |       |     |        |     |        |     |        |     |        |     |        |     |        |     |        |     |        |     |        |     |        |    |        |     |        |    |        |     |        |    |        |     |        |     |        |    |        |    |        |    |        |    |        |    |
| 417.16   | ~5                 |                                                                                                                                                                                                                                                                                                                                                                                                                                                                                                                                                                                                                                                                                                                                                                                                                                                                                                                                                                                                                                                                                                                           |     |                    |       |     |       |     |        |     |        |     |        |     |        |     |        |     |        |     |        |     |        |     |        |     |        |    |        |     |        |    |        |     |        |    |        |     |        |     |        |    |        |    |        |    |        |    |        |    |
| 445.16   | ~5                 |                                                                                                                                                                                                                                                                                                                                                                                                                                                                                                                                                                                                                                                                                                                                                                                                                                                                                                                                                                                                                                                                                                                           |     |                    |       |     |       |     |        |     |        |     |        |     |        |     |        |     |        |     |        |     |        |     |        |     |        |    |        |     |        |    |        |     |        |    |        |     |        |     |        |    |        |    |        |    |        |    |        |    |
| 499.83   | ~5                 |                                                                                                                                                                                                                                                                                                                                                                                                                                                                                                                                                                                                                                                                                                                                                                                                                                                                                                                                                                                                                                                                                                                           |     |                    |       |     |       |     |        |     |        |     |        |     |        |     |        |     |        |     |        |     |        |     |        |     |        |    |        |     |        |    |        |     |        |    |        |     |        |     |        |    |        |    |        |    |        |    |        |    |
| 577.58   | ~5                 |                                                                                                                                                                                                                                                                                                                                                                                                                                                                                                                                                                                                                                                                                                                                                                                                                                                                                                                                                                                                                                                                                                                           |     |                    |       |     |       |     |        |     |        |     |        |     |        |     |        |     |        |     |        |     |        |     |        |     |        |    |        |     |        |    |        |     |        |    |        |     |        |     |        |    |        |    |        |    |        |    |        |    |
| 618.43   | ~5                 |                                                                                                                                                                                                                                                                                                                                                                                                                                                                                                                                                                                                                                                                                                                                                                                                                                                                                                                                                                                                                                                                                                                           |     |                    |       |     |       |     |        |     |        |     |        |     |        |     |        |     |        |     |        |     |        |     |        |     |        |    |        |     |        |    |        |     |        |    |        |     |        |     |        |    |        |    |        |    |        |    |        |    |
| 653.56   | ~5                 |                                                                                                                                                                                                                                                                                                                                                                                                                                                                                                                                                                                                                                                                                                                                                                                                                                                                                                                                                                                                                                                                                                                           |     |                    |       |     |       |     |        |     |        |     |        |     |        |     |        |     |        |     |        |     |        |     |        |     |        |    |        |     |        |    |        |     |        |    |        |     |        |     |        |    |        |    |        |    |        |    |        |    |
| <p>I</p> | <p>147</p>         | <p>SAMPLE #5915 RT: 19.97 AV: 1 NL: 1.21E7<br/>T: FTMS - p ESI Full ms [50.0000-750.0000]</p> <p>Relative Abundance vs m/z</p> <table border="1"> <thead> <tr> <th>m/z</th> <th>Relative Abundance</th> </tr> </thead> <tbody> <tr><td>61.99</td><td>~55</td></tr> <tr><td>91.00</td><td>~15</td></tr> <tr><td>100.93</td><td>~25</td></tr> <tr><td>115.92</td><td>~45</td></tr> <tr><td>130.94</td><td>~55</td></tr> <tr><td>146.97</td><td>~20</td></tr> <tr><td>174.96</td><td>100</td></tr> <tr><td>191.95</td><td>~15</td></tr> <tr><td>215.92</td><td>~10</td></tr> <tr><td>242.94</td><td>~35</td></tr> <tr><td>248.96</td><td>~10</td></tr> <tr><td>300.90</td><td>~5</td></tr> <tr><td>304.91</td><td>~20</td></tr> <tr><td>316.95</td><td>~5</td></tr> <tr><td>378.92</td><td>~15</td></tr> <tr><td>395.91</td><td>~5</td></tr> <tr><td>440.89</td><td>~10</td></tr> <tr><td>446.91</td><td>~10</td></tr> <tr><td>463.90</td><td>~5</td></tr> <tr><td>508.88</td><td>~5</td></tr> <tr><td>576.86</td><td>~5</td></tr> <tr><td>638.83</td><td>~5</td></tr> <tr><td>706.82</td><td>~5</td></tr> </tbody> </table> | m/z | Relative Abundance | 61.99 | ~55 | 91.00 | ~15 | 100.93 | ~25 | 115.92 | ~45 | 130.94 | ~55 | 146.97 | ~20 | 174.96 | 100 | 191.95 | ~15 | 215.92 | ~10 | 242.94 | ~35 | 248.96 | ~10 | 300.90 | ~5 | 304.91 | ~20 | 316.95 | ~5 | 378.92 | ~15 | 395.91 | ~5 | 440.89 | ~10 | 446.91 | ~10 | 463.90 | ~5 | 508.88 | ~5 | 576.86 | ~5 | 638.83 | ~5 | 706.82 | ~5 |
| m/z      | Relative Abundance |                                                                                                                                                                                                                                                                                                                                                                                                                                                                                                                                                                                                                                                                                                                                                                                                                                                                                                                                                                                                                                                                                                                           |     |                    |       |     |       |     |        |     |        |     |        |     |        |     |        |     |        |     |        |     |        |     |        |     |        |    |        |     |        |    |        |     |        |    |        |     |        |     |        |    |        |    |        |    |        |    |        |    |
| 61.99    | ~55                |                                                                                                                                                                                                                                                                                                                                                                                                                                                                                                                                                                                                                                                                                                                                                                                                                                                                                                                                                                                                                                                                                                                           |     |                    |       |     |       |     |        |     |        |     |        |     |        |     |        |     |        |     |        |     |        |     |        |     |        |    |        |     |        |    |        |     |        |    |        |     |        |     |        |    |        |    |        |    |        |    |        |    |
| 91.00    | ~15                |                                                                                                                                                                                                                                                                                                                                                                                                                                                                                                                                                                                                                                                                                                                                                                                                                                                                                                                                                                                                                                                                                                                           |     |                    |       |     |       |     |        |     |        |     |        |     |        |     |        |     |        |     |        |     |        |     |        |     |        |    |        |     |        |    |        |     |        |    |        |     |        |     |        |    |        |    |        |    |        |    |        |    |
| 100.93   | ~25                |                                                                                                                                                                                                                                                                                                                                                                                                                                                                                                                                                                                                                                                                                                                                                                                                                                                                                                                                                                                                                                                                                                                           |     |                    |       |     |       |     |        |     |        |     |        |     |        |     |        |     |        |     |        |     |        |     |        |     |        |    |        |     |        |    |        |     |        |    |        |     |        |     |        |    |        |    |        |    |        |    |        |    |
| 115.92   | ~45                |                                                                                                                                                                                                                                                                                                                                                                                                                                                                                                                                                                                                                                                                                                                                                                                                                                                                                                                                                                                                                                                                                                                           |     |                    |       |     |       |     |        |     |        |     |        |     |        |     |        |     |        |     |        |     |        |     |        |     |        |    |        |     |        |    |        |     |        |    |        |     |        |     |        |    |        |    |        |    |        |    |        |    |
| 130.94   | ~55                |                                                                                                                                                                                                                                                                                                                                                                                                                                                                                                                                                                                                                                                                                                                                                                                                                                                                                                                                                                                                                                                                                                                           |     |                    |       |     |       |     |        |     |        |     |        |     |        |     |        |     |        |     |        |     |        |     |        |     |        |    |        |     |        |    |        |     |        |    |        |     |        |     |        |    |        |    |        |    |        |    |        |    |
| 146.97   | ~20                |                                                                                                                                                                                                                                                                                                                                                                                                                                                                                                                                                                                                                                                                                                                                                                                                                                                                                                                                                                                                                                                                                                                           |     |                    |       |     |       |     |        |     |        |     |        |     |        |     |        |     |        |     |        |     |        |     |        |     |        |    |        |     |        |    |        |     |        |    |        |     |        |     |        |    |        |    |        |    |        |    |        |    |
| 174.96   | 100                |                                                                                                                                                                                                                                                                                                                                                                                                                                                                                                                                                                                                                                                                                                                                                                                                                                                                                                                                                                                                                                                                                                                           |     |                    |       |     |       |     |        |     |        |     |        |     |        |     |        |     |        |     |        |     |        |     |        |     |        |    |        |     |        |    |        |     |        |    |        |     |        |     |        |    |        |    |        |    |        |    |        |    |
| 191.95   | ~15                |                                                                                                                                                                                                                                                                                                                                                                                                                                                                                                                                                                                                                                                                                                                                                                                                                                                                                                                                                                                                                                                                                                                           |     |                    |       |     |       |     |        |     |        |     |        |     |        |     |        |     |        |     |        |     |        |     |        |     |        |    |        |     |        |    |        |     |        |    |        |     |        |     |        |    |        |    |        |    |        |    |        |    |
| 215.92   | ~10                |                                                                                                                                                                                                                                                                                                                                                                                                                                                                                                                                                                                                                                                                                                                                                                                                                                                                                                                                                                                                                                                                                                                           |     |                    |       |     |       |     |        |     |        |     |        |     |        |     |        |     |        |     |        |     |        |     |        |     |        |    |        |     |        |    |        |     |        |    |        |     |        |     |        |    |        |    |        |    |        |    |        |    |
| 242.94   | ~35                |                                                                                                                                                                                                                                                                                                                                                                                                                                                                                                                                                                                                                                                                                                                                                                                                                                                                                                                                                                                                                                                                                                                           |     |                    |       |     |       |     |        |     |        |     |        |     |        |     |        |     |        |     |        |     |        |     |        |     |        |    |        |     |        |    |        |     |        |    |        |     |        |     |        |    |        |    |        |    |        |    |        |    |
| 248.96   | ~10                |                                                                                                                                                                                                                                                                                                                                                                                                                                                                                                                                                                                                                                                                                                                                                                                                                                                                                                                                                                                                                                                                                                                           |     |                    |       |     |       |     |        |     |        |     |        |     |        |     |        |     |        |     |        |     |        |     |        |     |        |    |        |     |        |    |        |     |        |    |        |     |        |     |        |    |        |    |        |    |        |    |        |    |
| 300.90   | ~5                 |                                                                                                                                                                                                                                                                                                                                                                                                                                                                                                                                                                                                                                                                                                                                                                                                                                                                                                                                                                                                                                                                                                                           |     |                    |       |     |       |     |        |     |        |     |        |     |        |     |        |     |        |     |        |     |        |     |        |     |        |    |        |     |        |    |        |     |        |    |        |     |        |     |        |    |        |    |        |    |        |    |        |    |
| 304.91   | ~20                |                                                                                                                                                                                                                                                                                                                                                                                                                                                                                                                                                                                                                                                                                                                                                                                                                                                                                                                                                                                                                                                                                                                           |     |                    |       |     |       |     |        |     |        |     |        |     |        |     |        |     |        |     |        |     |        |     |        |     |        |    |        |     |        |    |        |     |        |    |        |     |        |     |        |    |        |    |        |    |        |    |        |    |
| 316.95   | ~5                 |                                                                                                                                                                                                                                                                                                                                                                                                                                                                                                                                                                                                                                                                                                                                                                                                                                                                                                                                                                                                                                                                                                                           |     |                    |       |     |       |     |        |     |        |     |        |     |        |     |        |     |        |     |        |     |        |     |        |     |        |    |        |     |        |    |        |     |        |    |        |     |        |     |        |    |        |    |        |    |        |    |        |    |
| 378.92   | ~15                |                                                                                                                                                                                                                                                                                                                                                                                                                                                                                                                                                                                                                                                                                                                                                                                                                                                                                                                                                                                                                                                                                                                           |     |                    |       |     |       |     |        |     |        |     |        |     |        |     |        |     |        |     |        |     |        |     |        |     |        |    |        |     |        |    |        |     |        |    |        |     |        |     |        |    |        |    |        |    |        |    |        |    |
| 395.91   | ~5                 |                                                                                                                                                                                                                                                                                                                                                                                                                                                                                                                                                                                                                                                                                                                                                                                                                                                                                                                                                                                                                                                                                                                           |     |                    |       |     |       |     |        |     |        |     |        |     |        |     |        |     |        |     |        |     |        |     |        |     |        |    |        |     |        |    |        |     |        |    |        |     |        |     |        |    |        |    |        |    |        |    |        |    |
| 440.89   | ~10                |                                                                                                                                                                                                                                                                                                                                                                                                                                                                                                                                                                                                                                                                                                                                                                                                                                                                                                                                                                                                                                                                                                                           |     |                    |       |     |       |     |        |     |        |     |        |     |        |     |        |     |        |     |        |     |        |     |        |     |        |    |        |     |        |    |        |     |        |    |        |     |        |     |        |    |        |    |        |    |        |    |        |    |
| 446.91   | ~10                |                                                                                                                                                                                                                                                                                                                                                                                                                                                                                                                                                                                                                                                                                                                                                                                                                                                                                                                                                                                                                                                                                                                           |     |                    |       |     |       |     |        |     |        |     |        |     |        |     |        |     |        |     |        |     |        |     |        |     |        |    |        |     |        |    |        |     |        |    |        |     |        |     |        |    |        |    |        |    |        |    |        |    |
| 463.90   | ~5                 |                                                                                                                                                                                                                                                                                                                                                                                                                                                                                                                                                                                                                                                                                                                                                                                                                                                                                                                                                                                                                                                                                                                           |     |                    |       |     |       |     |        |     |        |     |        |     |        |     |        |     |        |     |        |     |        |     |        |     |        |    |        |     |        |    |        |     |        |    |        |     |        |     |        |    |        |    |        |    |        |    |        |    |
| 508.88   | ~5                 |                                                                                                                                                                                                                                                                                                                                                                                                                                                                                                                                                                                                                                                                                                                                                                                                                                                                                                                                                                                                                                                                                                                           |     |                    |       |     |       |     |        |     |        |     |        |     |        |     |        |     |        |     |        |     |        |     |        |     |        |    |        |     |        |    |        |     |        |    |        |     |        |     |        |    |        |    |        |    |        |    |        |    |
| 576.86   | ~5                 |                                                                                                                                                                                                                                                                                                                                                                                                                                                                                                                                                                                                                                                                                                                                                                                                                                                                                                                                                                                                                                                                                                                           |     |                    |       |     |       |     |        |     |        |     |        |     |        |     |        |     |        |     |        |     |        |     |        |     |        |    |        |     |        |    |        |     |        |    |        |     |        |     |        |    |        |    |        |    |        |    |        |    |
| 638.83   | ~5                 |                                                                                                                                                                                                                                                                                                                                                                                                                                                                                                                                                                                                                                                                                                                                                                                                                                                                                                                                                                                                                                                                                                                           |     |                    |       |     |       |     |        |     |        |     |        |     |        |     |        |     |        |     |        |     |        |     |        |     |        |    |        |     |        |    |        |     |        |    |        |     |        |     |        |    |        |    |        |    |        |    |        |    |
| 706.82   | ~5                 |                                                                                                                                                                                                                                                                                                                                                                                                                                                                                                                                                                                                                                                                                                                                                                                                                                                                                                                                                                                                                                                                                                                           |     |                    |       |     |       |     |        |     |        |     |        |     |        |     |        |     |        |     |        |     |        |     |        |     |        |    |        |     |        |    |        |     |        |    |        |     |        |     |        |    |        |    |        |    |        |    |        |    |
| <p>J</p> | <p>130</p>         | <p>SAMPLE #302 RT: 1.05 AV: 1 NL: 3.02E7<br/>T: FTMS + p ESI Full ms [50.0000-750.0000]</p> <p>Relative Abundance vs m/z</p> <table border="1"> <thead> <tr> <th>m/z</th> <th>Relative Abundance</th> </tr> </thead> <tbody> <tr><td>74.06</td><td>~10</td></tr> <tr><td>84.96</td><td>~5</td></tr> <tr><td>116.99</td><td>~15</td></tr> <tr><td>130.12</td><td>~35</td></tr> <tr><td>141.96</td><td>45</td></tr> <tr><td>173.98</td><td>~25</td></tr> <tr><td>182.99</td><td>~10</td></tr> <tr><td>214.09</td><td>~5</td></tr> <tr><td>250.11</td><td>~5</td></tr> <tr><td>279.16</td><td>~5</td></tr> <tr><td>322.91</td><td>~5</td></tr> <tr><td>408.79</td><td>~5</td></tr> <tr><td>494.83</td><td>~5</td></tr> <tr><td>524.66</td><td>~5</td></tr> <tr><td>574.44</td><td>~5</td></tr> <tr><td>643.16</td><td>~5</td></tr> </tbody> </table>                                                                                                                                                                                                                                                                         | m/z | Relative Abundance | 74.06 | ~10 | 84.96 | ~5  | 116.99 | ~15 | 130.12 | ~35 | 141.96 | 45  | 173.98 | ~25 | 182.99 | ~10 | 214.09 | ~5  | 250.11 | ~5  | 279.16 | ~5  | 322.91 | ~5  | 408.79 | ~5 | 494.83 | ~5  | 524.66 | ~5 | 574.44 | ~5  | 643.16 | ~5 |        |     |        |     |        |    |        |    |        |    |        |    |        |    |
| m/z      | Relative Abundance |                                                                                                                                                                                                                                                                                                                                                                                                                                                                                                                                                                                                                                                                                                                                                                                                                                                                                                                                                                                                                                                                                                                           |     |                    |       |     |       |     |        |     |        |     |        |     |        |     |        |     |        |     |        |     |        |     |        |     |        |    |        |     |        |    |        |     |        |    |        |     |        |     |        |    |        |    |        |    |        |    |        |    |
| 74.06    | ~10                |                                                                                                                                                                                                                                                                                                                                                                                                                                                                                                                                                                                                                                                                                                                                                                                                                                                                                                                                                                                                                                                                                                                           |     |                    |       |     |       |     |        |     |        |     |        |     |        |     |        |     |        |     |        |     |        |     |        |     |        |    |        |     |        |    |        |     |        |    |        |     |        |     |        |    |        |    |        |    |        |    |        |    |
| 84.96    | ~5                 |                                                                                                                                                                                                                                                                                                                                                                                                                                                                                                                                                                                                                                                                                                                                                                                                                                                                                                                                                                                                                                                                                                                           |     |                    |       |     |       |     |        |     |        |     |        |     |        |     |        |     |        |     |        |     |        |     |        |     |        |    |        |     |        |    |        |     |        |    |        |     |        |     |        |    |        |    |        |    |        |    |        |    |
| 116.99   | ~15                |                                                                                                                                                                                                                                                                                                                                                                                                                                                                                                                                                                                                                                                                                                                                                                                                                                                                                                                                                                                                                                                                                                                           |     |                    |       |     |       |     |        |     |        |     |        |     |        |     |        |     |        |     |        |     |        |     |        |     |        |    |        |     |        |    |        |     |        |    |        |     |        |     |        |    |        |    |        |    |        |    |        |    |
| 130.12   | ~35                |                                                                                                                                                                                                                                                                                                                                                                                                                                                                                                                                                                                                                                                                                                                                                                                                                                                                                                                                                                                                                                                                                                                           |     |                    |       |     |       |     |        |     |        |     |        |     |        |     |        |     |        |     |        |     |        |     |        |     |        |    |        |     |        |    |        |     |        |    |        |     |        |     |        |    |        |    |        |    |        |    |        |    |
| 141.96   | 45                 |                                                                                                                                                                                                                                                                                                                                                                                                                                                                                                                                                                                                                                                                                                                                                                                                                                                                                                                                                                                                                                                                                                                           |     |                    |       |     |       |     |        |     |        |     |        |     |        |     |        |     |        |     |        |     |        |     |        |     |        |    |        |     |        |    |        |     |        |    |        |     |        |     |        |    |        |    |        |    |        |    |        |    |
| 173.98   | ~25                |                                                                                                                                                                                                                                                                                                                                                                                                                                                                                                                                                                                                                                                                                                                                                                                                                                                                                                                                                                                                                                                                                                                           |     |                    |       |     |       |     |        |     |        |     |        |     |        |     |        |     |        |     |        |     |        |     |        |     |        |    |        |     |        |    |        |     |        |    |        |     |        |     |        |    |        |    |        |    |        |    |        |    |
| 182.99   | ~10                |                                                                                                                                                                                                                                                                                                                                                                                                                                                                                                                                                                                                                                                                                                                                                                                                                                                                                                                                                                                                                                                                                                                           |     |                    |       |     |       |     |        |     |        |     |        |     |        |     |        |     |        |     |        |     |        |     |        |     |        |    |        |     |        |    |        |     |        |    |        |     |        |     |        |    |        |    |        |    |        |    |        |    |
| 214.09   | ~5                 |                                                                                                                                                                                                                                                                                                                                                                                                                                                                                                                                                                                                                                                                                                                                                                                                                                                                                                                                                                                                                                                                                                                           |     |                    |       |     |       |     |        |     |        |     |        |     |        |     |        |     |        |     |        |     |        |     |        |     |        |    |        |     |        |    |        |     |        |    |        |     |        |     |        |    |        |    |        |    |        |    |        |    |
| 250.11   | ~5                 |                                                                                                                                                                                                                                                                                                                                                                                                                                                                                                                                                                                                                                                                                                                                                                                                                                                                                                                                                                                                                                                                                                                           |     |                    |       |     |       |     |        |     |        |     |        |     |        |     |        |     |        |     |        |     |        |     |        |     |        |    |        |     |        |    |        |     |        |    |        |     |        |     |        |    |        |    |        |    |        |    |        |    |
| 279.16   | ~5                 |                                                                                                                                                                                                                                                                                                                                                                                                                                                                                                                                                                                                                                                                                                                                                                                                                                                                                                                                                                                                                                                                                                                           |     |                    |       |     |       |     |        |     |        |     |        |     |        |     |        |     |        |     |        |     |        |     |        |     |        |    |        |     |        |    |        |     |        |    |        |     |        |     |        |    |        |    |        |    |        |    |        |    |
| 322.91   | ~5                 |                                                                                                                                                                                                                                                                                                                                                                                                                                                                                                                                                                                                                                                                                                                                                                                                                                                                                                                                                                                                                                                                                                                           |     |                    |       |     |       |     |        |     |        |     |        |     |        |     |        |     |        |     |        |     |        |     |        |     |        |    |        |     |        |    |        |     |        |    |        |     |        |     |        |    |        |    |        |    |        |    |        |    |
| 408.79   | ~5                 |                                                                                                                                                                                                                                                                                                                                                                                                                                                                                                                                                                                                                                                                                                                                                                                                                                                                                                                                                                                                                                                                                                                           |     |                    |       |     |       |     |        |     |        |     |        |     |        |     |        |     |        |     |        |     |        |     |        |     |        |    |        |     |        |    |        |     |        |    |        |     |        |     |        |    |        |    |        |    |        |    |        |    |
| 494.83   | ~5                 |                                                                                                                                                                                                                                                                                                                                                                                                                                                                                                                                                                                                                                                                                                                                                                                                                                                                                                                                                                                                                                                                                                                           |     |                    |       |     |       |     |        |     |        |     |        |     |        |     |        |     |        |     |        |     |        |     |        |     |        |    |        |     |        |    |        |     |        |    |        |     |        |     |        |    |        |    |        |    |        |    |        |    |
| 524.66   | ~5                 |                                                                                                                                                                                                                                                                                                                                                                                                                                                                                                                                                                                                                                                                                                                                                                                                                                                                                                                                                                                                                                                                                                                           |     |                    |       |     |       |     |        |     |        |     |        |     |        |     |        |     |        |     |        |     |        |     |        |     |        |    |        |     |        |    |        |     |        |    |        |     |        |     |        |    |        |    |        |    |        |    |        |    |
| 574.44   | ~5                 |                                                                                                                                                                                                                                                                                                                                                                                                                                                                                                                                                                                                                                                                                                                                                                                                                                                                                                                                                                                                                                                                                                                           |     |                    |       |     |       |     |        |     |        |     |        |     |        |     |        |     |        |     |        |     |        |     |        |     |        |    |        |     |        |    |        |     |        |    |        |     |        |     |        |    |        |    |        |    |        |    |        |    |
| 643.16   | ~5                 |                                                                                                                                                                                                                                                                                                                                                                                                                                                                                                                                                                                                                                                                                                                                                                                                                                                                                                                                                                                                                                                                                                                           |     |                    |       |     |       |     |        |     |        |     |        |     |        |     |        |     |        |     |        |     |        |     |        |     |        |    |        |     |        |    |        |     |        |    |        |     |        |     |        |    |        |    |        |    |        |    |        |    |



**Table S2** The molecular formulas and structural formulas of TCH and its intermediates products during the photocatalytic oxidation process.

| Name | Molecular formula       | Mass-to-charge ratio (m/z) | Structural formula                                                                   |
|------|-------------------------|----------------------------|--------------------------------------------------------------------------------------|
| TCH  | $C_{22}H_{24}O_8N_2$    | 445                        | 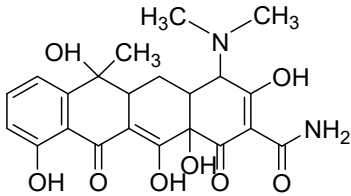   |
| A    | $C_{22}H_{24}O_{10}N_2$ | 477                        |    |
| B    | $C_{22}H_{24}O_9N_2$    | 461                        |   |
| C    | $C_{22}H_{22}O_9N_2$    | 459                        |  |
| D    | $C_{22}H_{22}O_7N_2$    | 427                        |  |
| E    | $C_{20}H_{19}O_7N_2$    | 399                        |  |
| F    | $C_{17}H_{25}O_8N$      | 371                        |  |

|   |                   |     |                                                                                                                                                                                                                                                                                                                                                                                                       |
|---|-------------------|-----|-------------------------------------------------------------------------------------------------------------------------------------------------------------------------------------------------------------------------------------------------------------------------------------------------------------------------------------------------------------------------------------------------------|
| G | $C_{15}H_{18}O_5$ | 279 | 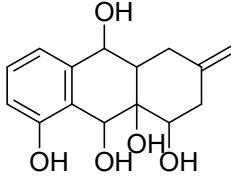 <p>The structure shows a complex polycyclic system. It features a benzene ring fused to a six-membered ring, which is further fused to another six-membered ring containing a vinyl group. There are four hydroxyl groups attached to the structure.</p>                                                           |
| H | $C_{15}H_{14}O_3$ | 242 |  <p>The structure consists of three fused six-membered rings. It has a methyl group (CH<sub>3</sub>) at the top, a carbonyl group (C=O) in the middle, and two hydroxyl groups (OH) at the bottom.</p>                                                                                                             |
| I | $C_6H_{14}O_2N_2$ | 147 |  <p>The structure is a branched molecule with a central carbon-carbon double bond. One carbon of the double bond is bonded to a hydroxyl group (HO) and a methylamino group (H<sub>3</sub>C-NH). The other carbon is bonded to an amino group (H<sub>2</sub>N) and a hydroxymethyl group (-CH<sub>2</sub>-OH).</p> |
| J | $C_6H_{11}O_2N$   | 130 |  <p>The structure is a six-membered ring with a double bond. It has an amino group (NH<sub>2</sub>) at the top, and two hydroxyl groups (OH) at the bottom.</p>                                                                                                                                                   |
